1 **Expression of a fungal lectin in Arabidopsis enhances plant growth and**  
2 **resistance towards microbial pathogens and plant-parasitic nematode**

3

4 Aboubakr Moradi<sup>1\*</sup>, Mohamed El-Shetehy<sup>1,2</sup>, Jordi Gamir<sup>3</sup>, Tina Austerlitz<sup>4</sup>, Paul Dahlin<sup>5</sup>, Krzysztof  
5 Wieczorek<sup>4</sup>, Markus Künzler<sup>6\*</sup> and Felix Mauch<sup>1</sup>

6 **Affiliations:**

7 <sup>1</sup>Department of Biology, University of Fribourg, Fribourg, Switzerland

8 <sup>2</sup>Botany and Microbiology Department, Faculty of Science, Tanta University, Tanta, Egypt

9 <sup>3</sup>Department Ciències Agràries i del Medi Natural (ESTCE), Universitat Jaume I, Castelló de la Plana,  
10 Spain

11 <sup>4</sup>Institute of Plant Protection, Department of Crop Sciences, University of Natural Resources and Life  
12 Sciences (BOKU), Vienna, Austria

13 <sup>5</sup>Agroscope, Research Division, Plant Protection, Phytopathology and Zoology in Fruit and Vegetable  
14 Production, Wädenswil, Switzerland

15 <sup>6</sup>Institute of Microbiology, Department of Biology, ETH Zürich, Zürich, Switzerland

16

17 **\*Correspondance**

18 Email: [aboubakr.moradi@unifr.ch](mailto:aboubakr.moradi@unifr.ch) Tel: +41 26 300 8831

19 Email: [markus.kuenzler@micro.biol.ethz.ch](mailto:markus.kuenzler@micro.biol.ethz.ch) Tel: +41 44 632 4925

20 **Conflict of interest:** The authors declare that they have no conflict of interest.

21 **Word count:**

22 Abstract: 209

23 Introduction: 776

24 Materials and Methods: 2067

25 Results: 1421

26 Discussion: 1162

27 **Abstract**

28 *Coprinopsis cinerea* lectin 2 (CCL2) is a fucoside-binding lectin from the basidiomycete *C. cinerea* that  
29 is toxic to the bacterivorous nematode *Caenorhabditis elegans* as well as animal-parasitic and  
30 fungivorous nematodes. We expressed CCL2 in Arabidopsis to assess its protective potential towards  
31 plant-parasitic nematodes. Our results demonstrate that expression of CCL2 enhances host resistance  
32 against the cyst nematode *Heterodera schachtii*. Surprisingly, CCL2-expressing plants were also more  
33 resistant to fungal pathogens including *Botrytis cinerea*, and the phytopathogenic bacterium  
34 *Pseudomonas syringae*. In addition, CCL2 expression positively affected plant growth indicating that  
35 CCL2 has the potential to improve two important agricultural parameters namely biomass production and  
36 general disease resistance. The mechanism of the CCL2-mediated enhancement of plant disease  
37 resistance depended on fucoside-binding by CCL2 as transgenic plants expressing a mutant version of  
38 CCL2 (Y92A), compromised in fucoside-binding, exhibited wild type disease susceptibility. The  
39 protective effect of CCL2 did not seem to be direct as the lectin showed no growth-inhibition towards *B.*  
40 *cinerea* in *in vitro* assays. We detected, however, a significantly enhanced transcriptional induction of  
41 plant defense genes in CCL2- but not CCL2-Y92A-expressing lines in response to infection with *B.*  
42 *cinerea* compared to wild type plants. This study demonstrates a potential of fungal defense lectins in  
43 plant protection beyond their use as toxins.

44 **Keywords:** *Coprinopsis cinerea* lectin 2, *Heterodera schachtii*, *Botrytis cinerea*, *Pseudomonas syringae*

45

## 46 **Introduction**

47 Plants are exposed to a wide range of biotic stress caused by numerous pathogens and pests. As a  
48 consequence, plants evolved a robust multi-layered innate immune system. The first layer, pathogen-  
49 associated molecular pattern (PAMP)-triggered immunity (PTI), is activated by the perception of PAMPs  
50 such as chitin oligomers or bacterial flagellin via pattern recognition receptors at the cell surface (Jones  
51 and Dangl, 2006; Schwessinger and Zipfel, 2008). Many pathogens have evolved effectors (virulence  
52 factors) to suppress PTI (Macho and Zipfel, 2015). The second layer of plant immunity, named effector-  
53 triggered immunity (ETI), is activated via detection of pathogen effectors by plant resistance proteins  
54 (Dangl and Jones, 2001). Plant defense responses are coordinated by hormonal signaling pathways with  
55 salicylic acid (SA) and jasmonic acid (JA) playing major roles (Robert-Seilaniantz *et al.*, 2011). A special  
56 form of induced plant disease resistance is known as systemic acquired resistance (SAR) which functions  
57 as a form of plant immunization. A local inoculation with a potential pathogen or treatment with specific  
58 chemical compounds enhances disease resistance of the whole plant against a wide range of pathogens.  
59 This is achieved by the local activation of signal transduction pathways that lead to the systemic induction  
60 of plant immune responses (Pieterse *et al.*, 2012).

61 Lectins are proteins that can reversibly bind to carbohydrate epitopes on polysaccharides, glycoproteins  
62 and glycolipids. Most characterized lectins have been isolated from plants, such as the well-known  
63 examples ricin and abrin (Sharon and Lis, 2004; Vandenborre *et al.*, 2011). Plant lectins are involved in  
64 defense-related functions and their roles in plant response to biotic and abiotic stresses have been well  
65 established (Van Damme *et al.*, 2004; Van Holle and Van Damme, 2018). As an example, Nictaba is a  
66 lectin from tobacco whose biosynthesis is induced in response to insect herbivory or jasmonate-related  
67 compounds. It binds to N-acetylglucosamine (GlcNAc) oligomers and is toxic to phytophagous insects  
68 (Delporte *et al.*, 2015). The Nictaba homolog in Arabidopsis is an F-box-Nictaba lectin which possesses a  
69 carbohydrate-binding activity towards Gal-GlcNAc (Stefanowicz *et al.*, 2012). Similar to the tobacco  
70 homolog, the gene coding for F-box-Nictaba is stress-inducible (Stefanowicz *et al.*, 2016).

71 Fungi are a valuable source of lectins with novel carbohydrate specificities. The majority of fungal lectins  
72 have been discovered from fruiting bodies and sclerotia (82%) and few from microfungi (15%) and yeasts  
73 (3%) (Varrot *et al.*, 2013). Fungal lectins have various applications in biomedicine, for instance as cancer  
74 cell biomarkers, diagnostic agents, mitogens, antimicrobial and antiviral agents, immunomodulators,  
75 antitumor and antiproliferative agents and other therapeutic applications (Hassan *et al.*, 2015; Singh *et al.*,  
76 2019). There are many reports describing the antimicrobial activity of fungal lectins. For example,  
77 *Aleuria aurantia* lectin showed antifungal activity against *Mucor racemosus* by specifically binding to L-  
78 fucose-containing polysaccharides at the surface of fungal cell walls (Amano *et al.*, 2012). Similarly,

79 *Gymnopilus spectabilis* and *Schizophyllum commune* lectins inhibit the growth of *Aspergillus niger*  
80 (Albores *et al.*, 2014; Chumkhunthod *et al.*, 2006). A lectin isolated from fruiting bodies of the mushroom  
81 *Sparassis latifolia* showed antifungal and antibacterial activity (Chandrasekaran *et al.*, 2016). Many  
82 fungal lectins also show insecticidal and nematocidal activity (Künzler, 2015; Sabotic *et al.*, 2016). For  
83 example, an actinoporin-like lectin from edible mushroom *Xerocomus chrysenteron* is toxic to the fruit  
84 fly *Drosophila melanogaster* and to aphids (Jaber *et al.*, 2008; Trigueros *et al.*, 2003). *Marasmius*  
85 *oreades* agglutinin (MOA) has a  $\beta$ -trefoil domain with an additional cysteine-protease domain at the C-  
86 terminus. Interestingly, both the glycolipid-binding and enzymatic activities of MOA are required for its  
87 toxicity towards *Caenorhabditis elegans* (Wohlschlager *et al.*, 2011). *Coprinopsis cinerea* lectin 2  
88 (CCL2) is a  $\beta$ -trefoil dimeric lectin, that shows toxicity towards *C. elegans* and *D. melanogaster* (Bleuler-  
89 Martinez *et al.*, 2017; Schubert *et al.*, 2012). CCL2 exerts its toxicity by binding to glycoproteins carrying  
90 an  $\alpha$ 1,3-fucosylated N-glycan core at the surface of the *C. elegans* intestinal epithelium (Schubert *et al.*,  
91 2012; Stutz *et al.*, 2015). Cytoplasmic expression of CCL2 in the fungus, *Ashbya gossypii*, conferred  
92 resistance towards fungivorous nematodes (Tayyrov *et al.*, 2018). Purified CCL2 inhibited larval  
93 development of the animal parasitic nematode *Haemonchus contortus* (Heim *et al.*, 2015).

94 There are many reports of the potential role of plant lectins in plant immunity. The role of fungal lectins  
95 in the regulation of immunity is, however, poorly understood (Künzler, 2018). Similarly, their  
96 biotechnological application for plant protection and disease management is largely neglected. This study  
97 demonstrates that expression of CCL2 in Arabidopsis plants enhances disease resistance against the sugar  
98 beet cyst nematode *Heterodera schachtii*, three fungal pathogens and the phytopathogenic bacterium *P.*  
99 *syringae*. Enhanced disease resistance appears to be mediated by the carbohydrate-binding ability of  
100 CCL2 as a binding-deficient mutant version of the CCL2 protein showed no protective function.

## 101 **Materials and Methods**

### 102 **Plant growth conditions and quantification of growth phenotype**

103 Wild type (WT) Arabidopsis ecotype Columbia-0 (Col-0) was received from the Nottingham Arabidopsis  
104 Stock Centre (Nottingham, UK). Seeds were sown into Jiffy artificial soil (Jiffy International AS,  
105 Kristiansand, Norway). After stratification at 4°C for 3 days, plants were transferred to growth chambers  
106 with the following condition: 22.5 °C day / 19°C night temperature and 16 h of light (photon flux  
107 density 100  $\mu\text{mol m}^{-2} \text{s}^{-1}$ ) with 60% relative humidity. For growth quantification rosettes of 4 four-week-  
108 old plants were harvested and carefully cleaned to remove non-plant particles. After recording the fresh  
109 weight (FW), the rosettes were incubated overnight at 80°C overnight to determine the dry weight (DW).  
110 The experiment was repeated three times.

111

### 112 **Construction of plant expression vectors**

113 Plasmids directing the expression of 3xFLAG tagged CCL2 or CCL2-Y92A under the control of the  
114 CaMV 35S promoter were constructed using the Gateway Cloning Technology (Thermo Fisher Scientific,  
115 San Jose, USA). The open reading frames of CCL2 and CCL2-Y92A were PCR-amplified from  
116 respective *E. coli* expression plasmids using gene-specific primers. The PCR was performed using  
117 Phusion High-Fidelity DNA Polymerase (New England Biolabs, Ipswich, USA). After agarose gel  
118 electrophoresis the PCR products were extracted from the gel with the QIAquick Gel Extraction Kit  
119 (Qiagen, Hilden, Germany) and inserted into a pENTR vector (pENTR™/D-TOPO™ Cloning Kit,  
120 Thermo Fisher Scientific, San Jose, USA). The products were transformed into chemically competent  
121 TOP10 *E. coli* cells. Positive colonies were verified by colony PCR (Biometra, Goettingen, Germany)  
122 and DNA sequencing (Eurofins Genomics, Ebersberg, Germany). The entry plasmids were subsequently  
123 recombined into the binary Gateway overexpression vector pB2GW7 (Karimi *et al.*, 2002), using LR  
124 reaction (Gateway™ LR Clonase™ II Enzyme mix, Thermo Fisher Scientific, San Jose, USA). The  
125 resulting expression plasmids containing 35S::CCL2-3xFLAG or 35S::CCL2-Y92A-3xFLAG constructs,  
126 respectively, were verified by colony PCR and transformed into *Agrobacterium tumefaciens* strain  
127 GV3101 by the freeze-thaw method (Schütze *et al.*, 2009).

128

### 129 **Overexpression of CCL2 and CCL2-Y92A in Arabidopsis**

130 *Agrobacterium*-mediated transformation of Col-0 plants using the floral dip method was performed as  
131 previously described (Zhang *et al.*, 2006). Transformed plants were selected by spraying 15  $\mu\text{g/mL}$  of

132 Glufosinate-ammonium (Basta<sup>®</sup>, Bayer CropScience AG, Germany) twice within two weeks after sowing.  
133 Standard immunoblotting procedures were performed to measure the expression level of recombinant  
134 proteins in transgenic lines. Leaf tissue of 4-week-old plants was harvested and frozen in liquid nitrogen.  
135 The frozen tissue in 1.5 ml tubes (Eppendorf, Hamburg, Germany) containing two 3 mm glass beads was  
136 ground with a mixer mill (Retsch<sup>®</sup>MM400, Retsch Technology GmbH, Haan, Germany) adjusted at 30  
137 Hz for 3 min. Ninety  $\mu$ L Laemmli buffer (375 mM Tris-HCl, pH 6.8, 37% glycerol, 0.06% bromophenol  
138 blue sodium salt, 12% sodium dodecyl sulfate, and 5%  $\beta$ -mercaptoethanol) was added. Tubes were  
139 incubated for 10 min at 95°C with shaking (1400 rpm). After centrifugation 10  $\mu$ L of the supernatant was  
140 used for SDS-PAGE. The separated proteins were transferred to nitrocellulose membranes (Sigma-  
141 Aldrich) with a Mini Trans-Blot<sup>®</sup> Cell (Bio-Rad Laboratories, California, USA). As a loading control, the  
142 membranes were stained with Ponceau S (1% acetic acid, 0.1% (w/v) Ponceau S) for 5 min at room  
143 temperature, washed twice with 5% acetic acid and once with water. For immunoblotting, membranes  
144 were blocked with 3% milk in TBST buffer (150 mM NaCl, 10 mM Tris, 0.1% (v/v) Triton X-100, pH  
145 7.6). Anti-FLAG primary antibodies (1:1000; monoclonal anti-FLAG M2-Peroxidase (HRP) clone M2,  
146 Sigma-Aldrich) were applied for 1h to detect FLAG-tagged proteins. Pierce ECL Western Blotting  
147 Substrate (Thermo Fisher Scientific, USA) and horseradish peroxidase (HRP) were used for blot  
148 development. Signals were detected by ImageQuant Las 4000 (GE Healthcare Life Sciences,  
149 Marlborough, USA). From 60 transgenic plants two independent lines expressing either CCL2 or CCL2-  
150 Y92A at comparable levels in the T3 generation were selected for further experiments.

151

## 152 **Construction of bacterial expression vectors**

153 For bacterial expression, cDNAs of *CCL2* and *CCL2-Y92A*, respectively, were inserted between the *NdeI*  
154 and *XhoI* sites of the bacterial expression vector pET-24a containing a HIS-tag (Novagen, Madison,  
155 USA). The ligated products were transformed into TOP10 *E. coli* competent cells. After colony PCR and  
156 sequence verification, the purified plasmids were transformed into *E. coli* BL21 (DE3) for protein  
157 production (Novagen, Madison, USA).

158

## 159 **Heterologous protein expression and protein purification**

160 Bacterial cells were cultured in Luria Bertani (LB) broth at 37°C to an optical density of  $OD_{600} = 0.8$ .  
161 Protein production was induced by the addition of 0.5 mM isopropyl  $\beta$ -D-1-thiogalactopyranoside (IPTG;  
162 AppliChem GmbH, Germany). Bacteria were further incubated at 16°C for 18 h. Protein extraction and  
163 purification were conducted as previously described (Schubert *et al.*, 2012). HIS-tagged proteins were

164 purified by metal-affinity chromatography using Ni-NTA resins (Qiagen, Hilden, Germany). Protein  
165 concentration was estimated by the Pierce BCA Protein Assay Kit (Thermo Fisher Scientific, San Jose,  
166 USA) and the purity of CCL2 and CCL2-Y92A was examined by SDS-PAGE.

167

### 168 ***In vitro* antifungal assay**

169 Antifungal activity of CCL2 proteins against *B. cinerea* strain BMM was tested in 96-well Costar cell  
170 culture plates (Corning Incorporated, Corning, USA) in a total volume of 200  $\mu$ L. Spores of *B. cinerea*  
171 were diluted in 25% PDB medium (Oxoid, Hampshire, UK) and used at a final density of  $1 \times 10^3$  spores  
172  $\text{mL}^{-1}$ . Purified CCL2 proteins in 20 mM Na phosphate buffer pH 6 were added at final concentrations of  
173 0–1000  $\mu\text{g mL}^{-1}$ . After incubation on a shaking platform (80 rpm; 20°C),  $\text{OD}_{595}$  was measured using the  
174 cell imaging multi-mode plate reader Cytation™ 5 (Biotek, Winooski, USA). The absorbance reads were  
175 analyzed with Gen5 Image+ Software (Version 3.03.14, BioTek, Winooski, USA). Growth curves were  
176 generated by GraphPad Prism version 8.0.2 (GraphPad Software, Inc., La Jolla, USA). Experiments were  
177 repeated 3-times.

178

### 179 ***Heterodera schachtii* infection assay**

180 *H. schachtii* infection assays were performed according to (Bohlmann and Wieczorek, 2015). Transgenic  
181 seeds were surface-sterilized (Lindsey *et al.*, 2017), and grown on selective Murashige Skoog medium  
182 (MS) contained 3% sucrose and 10  $\text{mg L}^{-1}$  glufosinate-ammonium. Col-0 was grown on plates without  
183 glufosinate-ammonium. After five days, healthy seedlings were transferred to plates containing a  
184 modified 0.2 concentrated Knop medium supplemented with 2% sucrose (Sijmons *et al.*, 1991). Six plates  
185 per line with eight plants per plate were incubated in the growth chamber for seven days. Cysts of *H.*  
186 *schachtii* were collected from *in vitro* stock cultures. Hatching of 2<sup>nd</sup> stage juveniles (J2s) was stimulated  
187 by soaking cysts in 3 mM  $\text{ZnCl}_2$ . Prior to inoculation, the J2s were sterilized, and total root length was  
188 estimated according to Juørgensen (2001). For infection assays, plants were inoculated with 30 freshly  
189 hatched J2s per plant, left in the dark overnight and then transferred into a growth chamber. The  
190 nematode infection was assessed 14 dpi. The total numbers of females per root cm were calculated and  
191 the experiment was repeated three times.

192

### 193 **Disease resistance tests**

194 Two-independent CCL2 overexpressing lines or CCL2-Y92A overexpressing lines and WT were grown  
195 under the described conditions. After four weeks, four leaves per plant were inoculated with 6  $\mu\text{L}$  droplets  
196 of a spore suspension ( $5 \times 10^4$  spores  $\text{mL}^{-1}$ ) of *B. cinerea*. Plants were covered with a transparent plastic  
197 dome to keep high humidity and incubated in the dark. At 3 dpi, the lesion size was measured by Vernier  
198 caliper (MarCal 16 ER, Mahr GmbH, Germany). Twenty plants per line were tested, and three  
199 independent biological replicates were performed. Fungal hyphae and dead plant tissues were stained in a  
200 solution of ethanolic lactophenol Trypan Blue (Hael-Conrad *et al.*, 2015). The samples were analyzed  
201 using a Leica DMR microscope with bright-field settings. *Colletotrichum higginsianum* was grown on  
202 oatmeal agar (Condalab S.A., Madrid, Spain) for 7 days at 22°C. Four leaves of five-week-old  
203 Arabidopsis plants were inoculated with 10  $\mu\text{L}$  droplets of  $2 \times 10^6$  conidia  $\text{mL}^{-1}$  suspended in 25% PDB.  
204 Droplets of 25% PDB were used as a mock treatment. Plants were covered with a plastic dome to keep  
205 humidity and incubated in the growth chamber. Lesions were measured 10 dpi with a digital Vernier  
206 caliper (MarCal 16 ER, Mahr GmbH, Germany). Ten plants per line were tested and three independent  
207 biological replicates were performed. *Plectosphaerella cucumerina* was grown on CM0139 Potato  
208 Dextrose Agar plates (Oxoid, Hampshire, UK) at 25°C. Four leaves of four-week-old Arabidopsis plants  
209 were infected with 10  $\mu\text{L}$  droplets of  $5 \times 10^6$  spores  $\text{mL}^{-1}$  suspended in 25% PDB. The conditions of  
210 inoculation were as described for *C. higginsianum*. Lesion size was measured at 5 dpi. Ten plants per line  
211 were tested, and three independent biological replicates were performed. *Pseudomonas syringae* pv.  
212 *tomato* (*Pst*) DC3000 was cultured overnight at 28°C with shaking (180 rpm) in liquid LB medium  
213 (supplied with 50  $\text{mg L}^{-1}$  rifampicin). Bacterial cells were centrifuged at 3000 rpm for 10 min, and the  
214 pellet was diluted in 10 mM  $\text{MgCl}_2$ . For basal disease resistance assay, the leaves of four-week-old plants  
215 were syringe-infiltrated with bacterial suspension of *Pst* DC3000 ( $10^5$  CFU  $\text{mL}^{-1}$ ). Infiltrated leaves were  
216 harvested 72 hpi for quantification by qPCR of the *OprF* gene (Genebank 878442) as a marker of  
217 bacterial growth.

218

## 219 **Quantification of fungal and bacterial biomass**

220 The fungal biomass was quantified according to Gachon and Saindrenan (2004), with minor  
221 modifications. Ten leaf discs were harvested from inoculated leaves and immediately frozen in liquid  $\text{N}_2$ .  
222 For each line, three independent biological replicates were performed. Total DNA was isolated using  
223 Plant DNA mini Kit (Peqlab/VWR, Darmstadt, Germany). To quantify fungal or bacterial DNA content,  
224 the qPCR mixtures were prepared with 12.5  $\mu\text{L}$  of SYBR Green mix (Bioline, London, UK), 10  $\mu\text{L}$  of  
225 DNA (final amount 100 ng), and 0.75  $\mu\text{L}$  of forward and reverse primers (10  $\mu\text{M}$ ; Table S 1). The final  
226 volume was 25  $\mu\text{L}$ . The qPCR was conducted with a MIC qPCR machine (Bio Molecular Systems,



227 Australia) using the following conditions: 10 min at 95°C initial denaturation and 40 cycles (95°C for 15s,  
228 60°C for 1 min and 72°C for 30s). Specificity of amplification was analyzed by melting point analysis.  
229 The level of the fungal *Cutinase A* gene (Genebank Z69264) or the bacterial *OprF* gene (Genebank  
230 878442) were normalized against the *expG* gene (AT4G26410) of Arabidopsis (Czechowski *et al.*, 2005).  
231 The  $2^{(-\Delta\Delta Ct)}$  method was used to analyze the results (Rao *et al.*, 2013).

232

### 233 **Systemic acquired resistance (SAR)**

234 Three leaves of four-week-old Col-0 plants were infiltrated with either 500  $\mu\text{g mL}^{-1}$  of purified CCL2 or  
235 purified CCL2-Y92A in 10 mM  $\text{MgCl}_2$ . Infiltration with *Pst* DC3000 at  $10^6$  CFU  $\text{mL}^{-1}$  in 10 mM  $\text{MgCl}_2$   
236 served as positive control. Infiltration with 10 mM  $\text{MgCl}_2$  served as negative control. After 48 h, three  
237 distal leaves were inoculated with *Pst DC3000* ( $10^5$  CFU  $\text{mL}^{-1}$ ). Ten leaf discs were harvested from the  
238 distal leaves 3dpi with a cork borer (discs from different plant leaves) and used for DNA extraction. The  
239 level of the bacterial *oprF* gene (Genbank 878442) was analyzed by qPCR. For transcript levels of SAR  
240 defense-related genes after the primary treatments, local leaves were sampled 2 days post treatment for  
241 RNA extraction, cDNA synthesis and qPCR analyses.

242

### 243 **Transcript levels of defense-related genes**

244 Transcript levels of defense-related genes in response to *B. cinerea* or *Pst* were analyzed by qPCR.  
245 Leaves were ground in liquid  $\text{N}_2$ , and total RNA was extracted with the Spectrum™ Plant Total RNA Kit  
246 (Sigma Aldrich, Saint Louis, USA). The isolated RNA was treated with deoxyribonuclease I enzyme  
247 (Sigma Aldrich) to remove remaining DNA. Two micrograms of purified RNA were used for reverse  
248 transcription reactions with the Omniscript Reverse Transcription Kit (Qiagen, Hilden, Germany). The  
249 qPCR mixture contained 7.5  $\mu\text{L}$  of SYBR Green (Bioline, London, UK), 5  $\mu\text{L}$  of cDNA (corresponding to  
250 100 ng RNA), and 0.5  $\mu\text{L}$  of 10  $\mu\text{M}$  forward and reverse primers (Table S1). The final volume was  
251 completed with DEPC water to 15  $\mu\text{L}$ . The qPCR was done as follows: 10 min at 95°C initial  
252 denaturation and 40 cycles (95°C for 15s, 60°C for 1 min and 72°C for 30s). Runs were performed on a  
253 MIC qPCR machine (Bio Molecular Systems, Australia). Transcript levels were normalized against the  
254 *expG* gene (AT4G26410). The analysis was accomplished based on cycle threshold method ( $2^{(-\Delta\Delta Ct)}$ ; Rao  
255 *et al.*, 2013). Three biological replicates were performed for each sample.

256

### 257 **Statistical analysis**

258 Statistical analysis was carried out using GraphPad Prism version 8.0.2 (GraphPad Software, Inc., La  
259 Jolla, USA). One/two-way ANOVA analysis was conducted to identify significant differences among  
260 treatments relative to the control. Tukey or Dunnett tests were used for multiple comparisons between the  
261 TG lines and control. Asterisks indicate statistically significant differences ( $***P \leq 0.001$ ,  $**P \leq 0.01$ ,  $*P$   
262  $\leq 0.05$ ) whereas ns (not significant) indicates  $P > 0.05$ . The letters a and b signify a between-group  
263 difference at the  $P \leq 0.05$  level.

## 264 **Results**

### 265 **Expression of CCL2 in Arabidopsis boosts plant growth**

266 FLAG-tagged CCL2 and a mutated FLAG-tagged CCL2-Y92A version compromised in fucoside-binding  
267 were expressed in Arabidopsis (accession Col-0) under the control of the CaMV-35S promoter using the  
268 constructs *35S::CCL2-3xFLAG* and *35S::CCL2-Y92A-3xFLAG*, respectively. Transgenic plants were  
269 analyzed by qPCR and immunoblotting to select lines with a comparable expression level of CCL2 or  
270 CCL-Y92A, respectively (Fig. 1A and B). The transgenic lines grew bigger than WT plants (Fig. 1C).  
271 Quantification of rosettes of four-week-old plants indicated that fresh weight (FW) and dry weight (DW)  
272 were significantly higher in transgenic plants (Fig. 1D, and E). In CCL2 lines FW and DW of rosettes  
273 were 100% and 95% higher than in WT plants, respectively. The differences of FW and DW for CCL2-  
274 Y92A lines were not statistically significant compared to the WT plants.

275

### 276 **CCL2 enhances disease resistance against the plant-parasitic nematode *Heterodera schachtii***

277 Based on the previous *in vitro* evidence for nematicidal activity, CCL2 and CCL2-Y92A-expressing  
278 Arabidopsis lines were tested with the agronomically important sugar beet cyst nematode *H. schachtii*.  
279 Transgenic lines and WT plants were inoculated with J2 juveniles and the progression of nematode  
280 infection was evaluated in roots. The results indicated a protective effect of CCL2. The number of *H.*  
281 *schachtii* females per cm of root was significantly reduced by 35% in CCL2 lines compared to WT plants  
282 (Figure 2). In contrast, CCL2-Y92A-expressing lines showed similar susceptibility as WT plants. Our  
283 results indicate that CCL2 expression partially protected Arabidopsis roots from parasitism by *H.*  
284 *schachtii* and that the protective effect was dependent on carbohydrate-binding activity of CCL2.

285

### 286 **CCL2 enhances resistance of Arabidopsis against fungal pathogens**

287 In order to test whether the protective effect of CCL2 was specific for nematodes or more general, the  
288 transgenic CCL2 lines and WT plants were inoculated with droplets of a suspension of conidiospores of  
289 the fungal pathogen *B. cinerea*. *B. cinerea*, known as grey mold, is a necrotrophic plant pathogen that can  
290 infect more than 200 plant species, causing losses of agricultural products both pre- and post-harvest  
291 (Dean *et al.*, 2012). The lesion size caused by the fungal infection was analyzed at 3 dpi (day post-  
292 inoculation). The pathogen successfully colonized WT and CCL2-Y92A-expressing plants as indicated by  
293 the formation of large necrotic lesions spreading from the inoculation site. In contrast, in the two CCL2-  
294 expressing lines such lesions were significantly smaller and surrounded by a lighter colored halo (Fig.

295 3A). Trypan Blue staining revealed the growth of fungal hyphae within the infected leaves. In WT and  
296 CCL-Y92A-expressing plants, fungal hyphae spread through the leaves whereas the colonization of  
297 leaves by the fungus was impaired in CCL2-expressing plants (Fig. 3B). Quantitative analysis showed  
298 that the lesion size in the CCL2 plants, including the lighter colored halo, was reduced to 54% compared  
299 to WT. No significant difference was detected between CCL2-Y92A lines and WT plants (Fig. 3C).  
300 Quantification of fungal biomass based on qPCR analysis of fungal DNA present in inoculated plants  
301 confirmed the results of the macro- and microscopic analysis (Fig. 3D). At 2 dpi, the *B. cinerea* biomass  
302 was significantly higher in WT and CCL2-Y92A plants compared to CCL2 plants. These results indicated  
303 that expression of CCL2 inhibited colonization of the plant by the fungus in a carbohydrate-binding-  
304 dependent manner. In order to test the specificity of the antifungal effect of CCL2, the Arabidopsis CCL2  
305 lines, CCL2-Y92A lines and WT plants were challenged with the fungal pathogens *Colletotrichum*  
306 *higginsianum* or *Plectosphaerella cucumerina*. *C. higginsianum* is a hemibiotrophic pathogen that  
307 globally causes disease in many economically important crops (Yan *et al.*, 2018). Likewise, *P.*  
308 *cucumerina* is a necrotrophic pathogen that causes diseases in crops worldwide (Sanchez-Vallet *et al.*,  
309 2010). Plant leaves were inoculated with droplets of *C. higginsianum* spore suspensions. CCL2 lines  
310 showed at 10 dpi a significant reduction of lesion size of 60% (L1) and 59% (L2) compared to WT plants  
311 (Fig. 3E). Similarly, after inoculation with spores of *P. cucumerina*, the lesions of the CCL2 lines after 5  
312 dpi were 39% (L1) and 36% (L2) smaller than in WT plants (Fig. 3F). Plants expressing CCL-Y92A  
313 showed WT-like disease resistance to both fungi. Taken together, the results demonstrate that expression  
314 of CCL2 partially protected plants against a variety of fungal pathogens, including necrotrophs (*B.*  
315 *cinerea* and *P. cucumerina*) and hemibiotrophs (*C. higginsianum*). The protective effect depended on the  
316 ability of CCL2 to bind carbohydrates.

317

### 318 **CCL2 enhances transcript accumulation of plant defense genes upon pathogen inoculation**

319 In order to assess whether the fungal growth inhibition by the CCL2 lectin is direct, an *in vitro* assay for  
320 antifungal activity towards *B. cinerea* was conducted. The purified His-tagged CCL2 proteins (CCL2 and  
321 CCL2-Y92A; Supplementary Fig. S1) were applied to fungal spores in liquid medium and spore  
322 germination and hyphal growth were assessed. No inhibition of fungal growth was detected even at a  
323 concentration of 1 mg mL<sup>-1</sup> of purified protein (Supplementary Fig. S2). Based on these results, we  
324 reasoned that CCL2 might have an indirect effect on plant protection via the activation of plant immune  
325 responses. The transcript levels of Arabidopsis defense genes in WT plants and transgenic lines infection  
326 were assessed by qPCR (Fig. 4A-C). Analyzed Arabidopsis defense genes included methyl JA-inducible  
327 marker genes (*OBP2*, AT1G07640), *PLANT DEFENSIN (PDF1.2: AT5G44420)* and SA-inducible  
328 *PATHOGENESIS-RELATED PROTEIN-1 (PR-1: AT2G14610)*. No significant differences in transcript

329 levels between WT and transgenic lines were observed at 0 dpi indicating that CCL2 expression did not  
330 directly trigger defense gene expression. However, transcript levels of all three genes were enhanced at 1  
331 dpi in CCL2 lines compared to WT and CCL2-Y92A lines. Induction of *OBP2* transcript levels was  
332 enhanced 3.5-fold, *PDF1.2* transcripts 12-fold and *PR-1* transcripts 2.5-fold compared to WT at 1 dpi  
333 indicating a priming effect of CCL2 on pathogen-induced expression of these genes. The respective  
334 transcript levels were not significantly different between WT and CCL2-Y92A lines. These results  
335 suggested that the protective effect of CCL2-expression in Arabidopsis towards fungal pathogens might  
336 be achieved by boosting the immune responses of the host plant upon pathogen inoculation.

337

### 338 **Resistance against *Pseudomonas syringae* is enhanced in CCL2 lines**

339 Based on the increased resistance of the CCL2 lines against a variety of fungal plant pathogens, we were  
340 interested in assessing the resistance of plants against the bacterial plant pathogen *Pseudomonas syringae*  
341 *pv. tomato* (*Pst*), a hemibiotrophic pathogen that can infect many plant species (Glazebrook, 2005). WT  
342 plants and transgenic lines were inoculated with  $10^5$  CFU mL<sup>-1</sup> of a bacterial suspension. At 3 dpi plant  
343 tissues were analyzed by qPCR to quantify bacterial DNA based on the bacterial *OprF* gene (Ross and  
344 Somssich, 2016). The bacterial biomass based on *OprF* content was significantly reduced by 73% and  
345 57% in the CCL2 lines 1 and 2, respectively, compared to WT (Fig. 5). The difference between the  
346 CCL2-Y92A lines and WT was not significant. The results indicated that the expression of CCL2  
347 enhanced the resistance towards *P. syringae*. Similar to the results with fungal pathogens, the protective  
348 effect depended on the carbohydrate-binding activity of CCL2 as the mutant version CCL2-Y92A failed  
349 to protect plants against *P. syringae*.

350

### 351 **Exogenous application of purified CCL2 protein confers systemic acquired resistance (SAR)**

352 To further support the immune-activating properties of CCL2, the potential of exogenously applied CCL2  
353 for activation of defense gene expression and induction of SAR was analyzed. Purified CCL2 protein  
354 (500 µg mL<sup>-1</sup>) was locally infiltrated into leaves of WT plants and disease resistance towards *Pst* DC3000  
355 was analyzed in untreated distal leaves. Treatment of local leaves with CCL2 led to an induction of SAR  
356 against *Pst* DC3000 in challenge-inoculated systemic leaves comparable to inoculation of local leaves  
357 with *Pst* (Fig. 6A). In contrast, treatment with CCL2-Y92A failed to induce SAR as no significant  
358 difference compared to mock treatment was observed. The results suggested that exogenously applied  
359 CCL2 protein induced SAR against *Pst* in a carbohydrate-binding dependent manner. To test the potential  
360 of CCL2 for direct activation of defense gene expression, WT plants were infiltrated with purified CCL2  
361 protein (500 µg mL<sup>-1</sup>) and transcript levels of a number of defense-related genes were analyzed 48 hours

362 after treatment: *GLII* (AT1G80460) encoding a glycerol kinase, *GLYCEROL-3-PHOSPHATE (G3P)*  
363 *SYNTHESIS GENE GLYI* (AT2G40690), *PR-1* (AT2G14610), *RESPIRATORY BURST OXIDASE*  
364 *HOMOLOGS D* and *F* (*RBOHD*: AT5G47910 and *RBOHDF*: AT1G64060). Similar to treatment with  
365 the positive SAR control *Pst*, treatment with purified CCL2 protein resulted in significant  
366 increases compared to mock treatment in transcript abundance of all tested genes (Fig. 6B-F).  
367 CCL2-treated local leaves of WT plants showed a 39-fold, 13-fold, 13-fold, 19-fold and 8-fold  
368 increase in transcript levels of *GLII*, *GLYI*, *PR-1*, *RBOHD* or *RBOHF*, respectively, compared  
369 to mock-inoculated plants.

370

## 371 Discussion

372 The aim of our research was to test transgenic plants expressing the nematocidal CCL2 lectin of *C.*  
373 *cinerea* for enhanced disease resistance towards plant-parasitic nematodes. To this end, CCL2 or the  
374 binding-compromised mutated version CCL2-Y92A were constitutively expressed in Arabidopsis plants.  
375 Surprisingly, transgenic CCL2 lines showed multiple phenotypes. They were not only more resistant than  
376 WT against the sugar beet cyst nematode *H. schachtii* but also showed improved disease resistance  
377 towards fungal and bacterial pathogens. In addition, CCL2 expression had a positive effect on plant  
378 growth. The multiple phenotypes of CCL2 plants depended on the previously demonstrated carbohydrate-  
379 binding activity of CCL2 (Bleuler-Martinez *et al.*, 2017; Schubert *et al.*, 2012) as expression of CCL2-  
380 Y92A, a mutated version compromised in carbohydrate binding, did not cause detectable differences  
381 compared to WT plants. Unless CCL2 has additional, as of yet undiscovered carbohydrate-binding  
382 activities, the observed disease resistance related phenotypes must be the result of binding of CCL2 to  
383  $\alpha$ 1,3-fucosylated N-glycan cores.

384 Entomotoxic and nematotoxic activity of fungal lectins has been widely studied (Bleuler-Martinez *et al.*,  
385 2011; Künzler, 2015; Sabotic *et al.*, 2016). Similarly, *in vitro* antibacterial and antifungal activity of  
386 fungal lectins against pathogens have been described (Albores *et al.*, 2014; Amano *et al.*, 2012;  
387 Breitenbach Barroso Coelho *et al.*, 2018; Chandrasekaran *et al.*, 2016; Singh *et al.*, 2014). Transgenic  
388 plants expressing plant lectins showed enhanced resistance to phytopathogens and pests (Burrows *et al.*,  
389 1998; Ripoll *et al.*, 2003; Stefanowicz *et al.*, 2016; Van Holle *et al.*, 2016). However, to date no lectins of  
390 fungal origin have been expressed in plants for disease protection. CCL2-overexpressing Arabidopsis  
391 plants showed significantly reduced susceptibility to the cyst nematode *H. schachtii*. The protective effect  
392 of CCL2 is most probably mediated by its carbohydrate-binding activity as the CCL2-Y92A lines do not  
393 show improved resistance against nematodes. *H. schachtii* is an obligate biotroph taking up the nutrients  
394 only after induction of feeding sites within the host root tissue. Hence, it was not possible to directly test  
395 *in vitro* toxic effects of CCL2 on parasite development. It remains, therefore, an open question whether  
396 the protective effect of CCL2 is direct via its nematocidal activity and/or indirect via primed induction of  
397 plant defenses as shown for other priming-active compounds known to enhance resistance towards *e.g.*  
398 root-knot nematodes (Cohen *et al.*, 2016; Oka *et al.*, 1999).

399 CCL2 lines were compared to WT and CCL2-Y92A lines more resistant to three fungal pathogens. The  
400 failure of CCL2-Y92A to protect plants from infection indicates that the carbohydrate-binding activity of  
401 CCL2 is essential for the observed protection. CCL2 did not have a toxic effect on the *in vitro* growth of  
402 *B. cinerea*. Hence, CCL2 is unlikely to protect plants via direct antifungal activity. As an alternative, we  
403 tested whether CCL2 possibly protects plants indirectly via activation of plant defense responses.

404 Transgenically expressed CCL2 had no direct effect on the constitutive expression of defense genes.  
405 However, in response to *B. cinerea* CCL2 plants showed a significantly enhanced accumulation of  
406 transcripts of JA-regulated *OBP2* and *PDF1.2* as well as SA-regulated *PR-1* genes compared to WT and  
407 CCL2-Y92A lines. The CCL2 lines reacted more strongly in terms of defense gene expression to  
408 inoculation with *B. cinerea*. Boosted activation of defense gene expression in response to pathogens, also  
409 called priming, has been demonstrated to enhance general disease resistance (Conrath *et al.*, 2006;  
410 Mauch-Mani *et al.*, 2017). It is, therefore, likely that the CCL2-mediated defense priming contributes to  
411 the enhanced protection of CCL2-expressing lines against fungal pathogens. Priming typically enhances  
412 disease resistance against many different pathogens. In line with this, CCL2 lines were also significantly  
413 more resistant to the bacterial pathogen *Pst*.

414 Local treatment with purified CCL2 enhanced the disease resistance towards *Pst* in systemic leaves  
415 comparable to primary inoculation with the known SAR inducer *Pst*. In contrast, treatment with purified  
416 CCL2-Y92A had no effect on disease resistance in systemic leaves. Hence, CCL2 activated SAR  
417 signaling pathways dependent on its carbohydrate-binding activity. Transcript levels of SAR-related  
418 genes were significantly enhanced in local leaves of CCL2-infiltrated WT plants compared to mock-  
419 treated plants indicating that CCL2 functions similarly to other defense activating compounds (Tripathi *et*  
420 *al.*, 2019). Transgenically expressed CCL2 did not directly affect defense gene expression as the  
421 transgenic CCL2 lines showed WT transcript levels in the absence of a pathogen. In contrast, treatment of  
422 plants with purified CCL2 caused enhanced transcript accumulation of defense genes. This contradiction  
423 is likely the result of the different concentrations of CCL2 present in the transgenic lines and in plants  
424 treated with purified CCL2. Many priming active compounds are known to directly induce immune  
425 responses depending on their concentration (Conrath *et al.*, 2006; Mauch-Mani *et al.*, 2017). At lower  
426 concentrations they still can protect plants from infection without directly affecting defense gene  
427 expression by sensitizing the induction of defense responses upon pathogen attack. The positive effect of  
428 CCL2 expression on plant growth was an unexpected finding as plants manipulated for enhanced disease  
429 resistance often suffer from fitness costs (Bowling *et al.*, 1994; Mauch *et al.*, 2001). However, priming  
430 effects at low concentrations are normally not linked with a growth penalty (Conrath *et al.*, 2006; Mauch-  
431 Mani *et al.*, 2017). The positive effect of CCL2 on plant growth also depends on the carbohydrate-binding  
432 activity.

433 Similar to previous findings showing nematicidal activity of CCL2 (Bleuler-Martinez *et al.*, 2017;  
434 Schubert *et al.*, 2012), our results confirm the importance of the binding of CCL2 to  $\alpha$ 1,3-fucosylated N-  
435 glycans for its immune-stimulating function as the binding-deficient mutant CCL2-Y92A was not able to  
436 protect plants against plant-parasitic nematodes and microbial pathogens. We speculate that CCL2  
437 enhances plant immunity via binding to plant glycoproteins or other glycosylated compounds that are



438 involved in regulation of immunity. Interestingly, a recent study indicated that  $\alpha$ 1,3-fucosylated N-  
439 glycans play an essential role in plant immunity (Zhang *et al.*, 2019). Mutations in a gene involved in the  
440 biosynthesis of GDP-L-fucose (*SCORD6/MURI*) negatively affected PTI and ETI, including  
441 glycosylation of immune receptors. In addition, compromised defenses were also observed in mutants of  
442 several fucosyltransferases with specific substrates (O-glycan, N-glycan or DELLA transcriptional  
443 repressors; Zhang *et al.*, 2019). These results hinted to a so far unknown plant immunity-related role of L-  
444 fucose biosynthesis and fucosylation. Biochemical approaches will be needed to identify the plant targets  
445 of CCL2.

446 In summary, overexpression of CCL2 in Arabidopsis improved plant growth and general disease  
447 resistance towards the cyst nematode *H. schachtii* and various plant pathogens. Protection against *H.*  
448 *schachtii* is likely based on the direct nematotoxic effect of CCL2. CCL2 did not show direct toxicity  
449 towards fungi but primed the expression of JA/SA-related defense genes that are important for plant  
450 immunity against microbial pathogens. Thus, CCL2 is postulated to induce resistance against microbial  
451 pathogens by binding to fucosylated compounds with a role in plant immunity. In agreement with such a  
452 model, the mutant version of CCL2 with abolished carbohydrate-binding lost its protective function.  
453 Thus, the fungal lectin CCL2 does not only function as a nematotoxin but has additional roles as a  
454 positive regulator of plant immunity.

455 **Supporting information**

456 **Table S1** Sequences of primers for qPCR. F: Forward primer. R: Reverse primer.

457 **Figure S1** CCL2 expression in *E. coli* and purification.

458 **Figure S2** *In vitro* antimicrobial assay of bacterially produced CCL2 and CCL2-Y92A against *B. cinerea*.

459

460 **Acknowledgments**

461 AM was supported by a Swiss Government Excellence Scholarship for Foreign Scholars (Swiss State  
462 Secretariat for Education, Research, and Innovation). FM was supported by the Swiss National Science  
463 Foundation (grant no. 31003A\_129696). MK is supported by the Swiss National Science Foundation  
464 (grant no. 31003A\_173097).

465

466 **Authors contributions**

467 AM: production of CCL2 expressing transgenic Arabidopsis plants, disease resistance tests with *B.*  
468 *cinerea* and *C. higginsianum*; heterologous expression of CCL2 in *E. coli*; antifungal assays; planning  
469 projects, analyzing data and writing of manuscript; ME: disease resistance against *Pst* and SAR  
470 experiments; JG: disease resistance tests against *P. cucumerina*; TA and KW: *H. schachtii* infection  
471 assays; PD: writing of manuscript; MK: provided CCL2 and CCL2-Y92A cDNAs; planning projects and  
472 writing of manuscript; FM: supervising, planning projects and writing of manuscript.

473

474 **Availability of data and materials**

475 The raw data of the presented results of this study are available on request to the corresponding author.

476

477 **Accession numbers**

478 *CCL2* (GenBank ACD88750); *oprF* (Genbank: 878442); *cutinase A* (Genbank Z69264); *PDF 1.2*  
479 (AT5G44420); *PR-1* (AT2G14610); *OBP2* (AT1G07640); *GLII* (AT1G80460); *GLY1* (AT2G40690);  
480 *RBOHD* (AT5G47910); *RBOHF* (AT1G64060); *expG* (AT4G26410).

481

482

483 **References**

- 484 **Albores S, Mora P, Bustamante MJ, Cerdeiras MP, Franco Fraguas L.** 2014. Purification and  
485 applications of a lectin from the mushroom *Gymnopilus spectabilis*. *Appl Biochem Biotechnol* **172**, 2081-  
486 2090.
- 487 **Amano K, Katayama H, Saito A, Ando A, Nagata Y.** 2012. *Aleuria aurantia* lectin exhibits antifungal  
488 activity against *Mucor racemosus*. *Biosci Biotechnol Biochem* **76**, 967-970.
- 489 **Bleuler-Martinez S, Butsch A, Garbani M, Walti MA, Wohlschlager T, Potthoff E, Sabotic J,**  
490 **Pohleven J, Luthy P, Hengartner MO, Aebi M, Künzler M.** 2011. A lectin-mediated resistance of  
491 higher fungi against predators and parasites. *Mol Ecol* **20**, 3056-3070.
- 492 **Bleuler-Martinez S, Stutz K, Sieber R, Collot M, Mallet JM, Hengartner M, Schubert M, Varrot A,**  
493 **Künzler M.** 2017. Dimerization of the fungal defense lectin CCL2 is essential for its toxicity against  
494 nematodes. *Glycobiology* **27**, 486-500.
- 495 **Bohlmann H, Wiczorek K.** 2015. Infection assay of cyst nematodes on arabidopsis roots. *Bio Protoc* **5**,  
496 e1596.
- 497 **Bowling SA, Guo A, Cao H, Gordon AS, Klessig DF, Dong X.** 1994. A mutation in Arabidopsis that  
498 leads to constitutive expression of systemic acquired resistance. *Plant Cell* **6**, 1845-1857.
- 499 **Breitenbach Barroso Coelho LC, Marcelino Dos Santos Silva P, Felix de Oliveira W, de Moura**  
500 **MC, Viana Pontual E, Soares Gomes F, Guedes Paiva PM, Napoleao TH, Dos Santos Correia MT.**  
501 2018. Lectins as antimicrobial agents. *J Appl Microbiol* **125**, 1238-1252.
- 502 **Burrows PR, Barker AD, Newell CA, Hamilton W.** 1998. Plant-derived enzyme inhibitors and lectins  
503 for resistance against plant-parasitic nematodes in transgenic crops. *Pesticide Sci* **52**, 176-183.
- 504 **Chandrasekaran G, Lee YC, Park H, Wu Y, Shin HJ.** 2016. Antibacterial and antifungal activities of  
505 lectin extracted from fruiting bodies of the Korean cauliflower medicinal mushroom, *Sparassis latifolia*  
506 (*Agaricomycetes*). *Int J Med Mushrooms* **18**, 291-299.
- 507 **Chumkhunthod P, Rodtong S, Lambert SJ, Fordham-Skelton AP, Rizkallah PJ, Wilkinson MC,**  
508 **Reynolds CD.** 2006. Purification and characterization of an N-acetyl-D-galactosamine-specific lectin  
509 from the edible mushroom *Schizophyllum commune*. *Biochim Biophys Acta* **1760**, 326-332.
- 510 **Cohen Y, Vaknin M, Mauch-Mani B.** 2016. BABA-induced resistance: milestones along a 55-year  
511 journey. *Phytoparasitica* **44**, 513-538.
- 512 **Conrath U, Beckers GJ, Flors V, Garcia-Agustin P, Jakab G, Mauch F, Newman MA, Pieterse CM,**  
513 **Poinssot B, Pozo MJ, Pugin A, Schaffrath U, Ton J, Wendehenne D, Zimmerli L, Mauch-Mani B.**  
514 2006. Priming: getting ready for battle. *Mol Plant Microbe Interact* **19**, 1062-1071.

- 515 **Czechowski T, Stitt M, Altmann T, Udvardi MK, Scheible WR.** 2005. Genome-wide identification  
516 and testing of superior reference genes for transcript normalization in Arabidopsis. *Plant Physiol* **139**, 5-  
517 17.
- 518 **Dangl JL, Jones JD.** 2001. Plant pathogens and integrated defence responses to infection. *Nature* **411**,  
519 826-833.
- 520 **Dean R, Van Kan JA, Pretorius ZA, Hammond-Kosack KE, Di Pietro A, Spanu PD, Rudd JJ,**  
521 **Dickman M, Kahmann R, Ellis J, Foster GD.** 2012. The Top 10 fungal pathogens in molecular plant  
522 pathology. *Mol Plant Pathol* **13**, 414-430.
- 523 **Delporte A, Van Holle S, Lannoo N, Van Damme EJ.** 2015. The tobacco lectin, prototype of the family  
524 of Nictaba-related proteins. *Curr Protein Pept Sci* **16**, 5-16.
- 525 **Gachon C, Saindrenan P.** 2004. Real-time PCR monitoring of fungal development in *Arabidopsis*  
526 *thaliana* infected by *Alternaria brassicicola* and *Botrytis cinerea*. *Plant Physiol Biochem* **42**, 367-371.
- 527 **Glazebrook J.** 2005. Contrasting mechanisms of defense against biotrophic and necrotrophic pathogens.  
528 *Annu Rev Phytopathol* **43**, 205-227.
- 529 **Hael-Conrad V, Abou-Mansour E, Diaz-Ricci JC, Metraux JP, Serrano M.** 2015. The novel elicitor  
530 AsES triggers a defense response against *Botrytis cinerea* in *Arabidopsis thaliana*. *Plant Sci* **241**, 120-  
531 127.
- 532 **Hassan MA, Rouf R, Tiralongo E, May TW, Tiralongo J.** 2015. Mushroom lectins: specificity,  
533 structure and bioactivity relevant to human disease. *Int J Mol Sci* **16**, 7802-7838.
- 534 **Heim C, Hertzberg H, Butschi A, Bleuler-Martinez S, Aebi M, Deplazes P, Künzler M, Stefanic S.**  
535 2015. Inhibition of *Haemonchus contortus* larval development by fungal lectins. *Parasit Vectors* **8**, 425.
- 536 **Jaber K, Cuartero Diaz G, Haubruge E, Francis F.** 2008. Investigation of carbohydrate binding  
537 property of a fungal lectin from *Xerochomus chrysenteron* and potential use on *Myzus persicae* aphid.  
538 *Commun Agric Appl Biol Sci* **73**, 629-638.
- 539 **Jones JD, Dangl JL.** 2006. The plant immune system. *Nature* **444**, 323-329.
- 540 **Jürgensen K.** 2001. Untersuchungen zum Assimilat- und Wassertransfer in der Interaktion zwischen  
541 *Arabidopsis thaliana* and *Heterodera schachtii*. PhD thesis, Agrar- und Ernährungswissenschaftliche  
542 Fakultät, Christian-Albrecht Universität, Kiel, Germany.
- 543 **Karimi M, Inze D, Depicker A.** 2002. GATEWAY vectors for Agrobacterium-mediated plant  
544 transformation. *Trends Plant Sci* **7**, 193-195.
- 545 **Künzler M.** 2015. Hitting the sweet spot-glycans as targets of fungal defense effector proteins. *Molecules*  
546 **20**, 8144-8167.
- 547 **Künzler M.** 2018. How fungi defend themselves against microbial competitors and animal predators.  
548 *Plos Pathogens* **14**, e1007184.

- 549 **Lindsey BE, 3rd, Rivero L, Calhoun CS, Grotewold E, Brkljacic J.** 2017. Standardized method for  
550 high-throughput sterilization of *Arabidopsis* seeds. *J Vis Exp*, e56587.
- 551 **Macho AP, Zipfel C.** 2015. Targeting of plant pattern recognition receptor-triggered immunity by  
552 bacterial type-III secretion system effectors. *Curr Opin Microbiol* **23**, 14-22.
- 553 **Mauch-Mani B, Baccelli I, Luna E, Flors V.** 2017. Defense priming: an adaptive part of induced  
554 resistance. *Annu Rev Plant Biol* **68**, 485-512.
- 555 **Mauch F, Mauch-Mani B, Gaille C, Kull B, Haas D, Reimmann C.** 2001. Manipulation of salicylate  
556 content in *Arabidopsis thaliana* by the expression of an engineered bacterial salicylate synthase. *Plant J*  
557 **25**, 67-77.
- 558 **Oka Y, Cohen Y, Spiegel Y.** 1999. Local and systemic induced resistance to the root-knot nematode in  
559 tomato by DL-beta-Amino-n-Butyric Acid. *Phytopathol* **89**, 1138-1143.
- 560 **Pieterse CM, Van der Does D, Zamioudis C, Leon-Reyes A, Van Wees SC.** 2012. Hormonal  
561 modulation of plant immunity. *Annu Rev Cell Dev Biol* **28**, 489-521.
- 562 **Rao X, Huang X, Zhou Z, Lin X.** 2013. An improvement of the 2<sup>-(delta delta CT)</sup> method for  
563 quantitative real-time polymerase chain reaction data analysis. *Biostat Bioinforma Biomath* **3**, 71-85.
- 564 **Ripoll C, Favery B, Lecomte P, Van Damme E, Peumans W, Abad P, Jouanin L.** 2003. Evaluation of  
565 the ability of lectin from snowdrop (*Galanthus nivalis*) to protect plants against root-knot nematodes.  
566 *Plant Sci* **164**, 517-523.
- 567 **Robert-Seilantantz A, Grant M, Jones JD.** 2011. Hormone crosstalk in plant disease and defense: more  
568 than just jasmonate-salicylate antagonism. *Annu Rev Phytopathol* **49**, 317-343.
- 569 **Ross A, Somssich IE.** 2016. A DNA-based real-time PCR assay for robust growth quantification of the  
570 bacterial pathogen *Pseudomonas syringae* on *Arabidopsis thaliana*. *Plant Methods* **12**, 48.
- 571 **Sabotic J, Ohm RA, Künzler M.** 2016. Entomotoxic and nematotoxic lectins and protease inhibitors  
572 from fungal fruiting bodies. *Appl Microbiol Biotechnol* **100**, 91-111.
- 573 **Sanchez-Vallet A, Ramos B, Bednarek P, Lopez G, Pislewska-Bednarek M, Schulze-Lefert P,**  
574 **Molina A.** 2010. Tryptophan-derived secondary metabolites in *Arabidopsis thaliana* confer non-host  
575 resistance to necrotrophic *Plectosphaerella cucumerina* fungi. *Plant J* **63**, 115-127.
- 576 **Schubert M, Bleuler-Martinez S, Butschi A, Walti MA, Egloff P, Stutz K, Yan S, Collot M, Mallet**  
577 **JM, Wilson IB, Hengartner MO, Aebi M, Allain FH, Künzler M.** 2012. Plasticity of the beta-trefoil  
578 protein fold in the recognition and control of invertebrate predators and parasites by a fungal defence  
579 system. *Plos Pathogens* **8**, e1002706.
- 580 **Schütze K, Harter K, Chaban C.** 2009. Bimolecular fluorescence complementation (BiFC) to study  
581 protein-protein interactions in living plant cells. *Methods Mol Biol* **479**, 189-202.
- 582 **Schwessinger B, Zipfel C.** 2008. News from the frontline: recent insights into PAMP-triggered immunity  
583 in plants. *Curr Opin Plant Biol* **11**, 389-395.

- 584 **Sharon N, Lis H.** 2004. History of lectins: from hemagglutinins to biological recognition molecules.  
585 *Glycobiology* **14**, 53-62.
- 586 **Sijmons PC, Grundler FMW, von Mende N, Burrows PR, Wyss U.** 1991. *Arabidopsis thaliana* as a  
587 new model host for plant-parasitic nematodes. *Plant J* **1**, 245-254.
- 588 **Singh RS, Kaur HP, Singh J.** 2014. Purification and characterization of a mucin specific mycelial lectin  
589 from *Aspergillus gorakhpurensis*: application for mitogenic and antimicrobial activity. *PLoS One* **9**,  
590 e109265.
- 591 **Singh RS, Walia AK, Kennedy JF.** 2019. Mushroom lectins in biomedical research and development.  
592 *Int J Biol Macromol* **151**, 1340-1350.
- 593 **Stefanowicz K, Lannoo N, Proost P, Van Damme EJ.** 2012. Arabidopsis F-box protein containing a  
594 Nictaba-related lectin domain interacts with N-acetylglucosamine structures. *FEBS Open Bio* **2**, 151-158.
- 595 **Stefanowicz K, Lannoo N, Zhao Y, Eggermont L, Van Hove J, Al Atalah B, Van Damme EJ.** 2016.  
596 Glycan-binding F-box protein from *Arabidopsis thaliana* protects plants from *Pseudomonas syringae*  
597 infection. *BMC Plant Biol* **16**, 213.
- 598 **Stutz K, Kaech A, Aebi M, Künzler M, Hengartner MO.** 2015. Disruption of the *C. elegans* intestinal  
599 brush border by the fungal lectin CCL2 phenocopies dietary lectin toxicity in mammals. *PLoS One* **10**,  
600 e0129381.
- 601 **Tayyrov A, Schmieder SS, Bleuler-Martinez S, Plaza DF, Künzler M.** 2018. Toxicity of potential  
602 fungal defense proteins towards the fungivorous nematodes *Aphelenchus avenae* and *Bursaphelenchus*  
603 *okinawaensis*. *Appl Environ Microbiol* **84**, e02051-02018.
- 604 **Trigueros V, Lougarre A, Ali-Ahmed D, Rahbe Y, Guillot J, Chavant L, Fournier D, Paquereau L.**  
605 2003. *Xerocomus chrysenteron* lectin: identification of a new pesticidal protein. *Biochim Biophys Acta*  
606 **1621**, 292-298.
- 607 **Tripathi D, Raikhy G, Kumar D.** 2019. Chemical elicitors of systemic acquired resistance–salicylic  
608 acid and its functional analogs. *Curr plant biol* **17**, 48-59.
- 609 **Van Damme EJ, Barre A, Rouge P, Peumans WJ.** 2004. Cytoplasmic/nuclear plant lectins: a new  
610 story. *Trends Plant Sci* **9**, 484-489.
- 611 **Van Holle S, Smagghe G, Van Damme EJ.** 2016. Overexpression of Nictaba-Like lectin genes from  
612 *Glycine max* confers tolerance toward *Pseudomonas syringae* infection, aphid infestation and salt stress  
613 in transgenic *Arabidopsis* plants. *Front Plant Sci* **7**, 1590.
- 614 **Van Holle S, Van Damme EJM.** 2018. Signaling through plant lectins: modulation of plant immunity  
615 and beyond. *Biochem Soc Trans* **46**, 217-233.
- 616 **Vandenborre G, Smagghe G, Van Damme EJ.** 2011. Plant lectins as defense proteins against  
617 phytophagous insects. *Phytochem* **72**, 1538-1550.

- 618 **Varrot A, Basheer SM, Imberty A.** 2013. Fungal lectins: structure, function and potential applications.  
619 *Curr Opin Struct Biol* **23**, 678-685.
- 620 **Wohlschlager T, Butschi A, Zurfluh K, Vonesch SC, auf dem Keller U, Gehrig P, Bleuler-Martinez**  
621 **S, Hengartner MO, Aebi M, Künzler M.** 2011. Nematotoxicity of *Marasmius oreades* agglutinin  
622 (MOA) depends on glycolipid binding and cysteine protease activity. *J Biol Chem* **286**, 30337-30343.
- 623 **Yan Y, Yuan Q, Tang J, Huang J, Hsiang T, Wei Y, Zheng L.** 2018. *Colletotrichum higginsianum* as a  
624 model for understanding host-pathogen interactions: A Review. *Int J Mol Sci* **19**.
- 625 **Zhang L, Paasch BC, Chen J, Day B, He SY.** 2019. An important role of l-fucose biosynthesis and  
626 protein fucosylation genes in Arabidopsis immunity. *New Phytol* **222**, 981-994.
- 627 **Zhang X, Henriques R, Lin SS, Niu QW, Chua NH.** 2006. Agrobacterium-mediated transformation of  
628 *Arabidopsis thaliana* using the floral dip method. *Nature Protocols* **1**, 641-646.
- 629

## 630 **Figure Legends**

631 **Fig. 1.** Characterization of CCL2-expressing Arabidopsis lines. (A) qPCR analysis of relative CCL2 and  
632 CCL2-Y92A transcript levels in four-week-old plants. Transcript levels were normalized to *expG* gene  
633 (AT4G26410). Mean values  $\pm$  SE of 3 independent experiments. (B) Immunoblot visualizing the  
634 expression level of CCL2 and CCL2-Y92A proteins. FLAG-tagged proteins were detected with anti-  
635 FLAG antibodies. Ponceau-S stained Rubisco large subunit served as loading control. (C) Growth  
636 phenotype of transgenic lines compared to WT. Two independent lines (L1 and L2) are shown for each  
637 construct. (D) Fresh weight (FW) and (E) dry weight (DW) of shoots of four-week-old plants (n=12; 3  
638 independent experiments). Boxplots represent median and 1.5 times the interquartile range. Asterisks  
639 show significant differences between transgenic lines compared to the WT (\*\* $p \leq 0.001$ , \* $p \leq 0.01$ )  
640 determined by one-way ANOVA followed by *post-hoc* analysis with Dunnett's multiple-comparison test.

641  
642 **Fig. 2.** Partial resistance of CCL2-expressing plants towards the cyst nematode *H. schachtii*. Twelve-day-  
643 old Arabidopsis seedlings (WT, CCL2 and CCL2-Y92A lines) were inoculated with 30 freshly hatched  
644 juveniles per plant and evaluated 14 dpi for number of female nematodes per root centimeter. Boxplots  
645 represent median and 1.5 times the interquartile range (WT and CCL2 lines n= 16; CCL2-Y92A n=15; 3  
646 independent experiments). Asterisks above columns indicate statistically significant differences (\*\* $p \leq$   
647 0.001, \* $p \leq 0.01$ ) between CCL2 lines and WT plants, analyzed by one-way ANOVA and *post-hoc*  
648 analysis with Dunnett's multiple-comparison test.

649  
650 **Fig. 3.** Resistance of CCL2-expressing plants towards fungal pathogens. (A) Necrotic lesions caused by  
651 *B. cinerea* infection on leaves of four-week-old WT, CCL2- and CCL2-Y92A lines inoculated with 6  $\mu$ L  
652 droplets of a spore suspension ( $5 \times 10^4$  spores  $\text{mL}^{-1}$ ). Plants were photographed 3 dpi. Size bar=1cm. (B)  
653 Trypan Blue-staining of Arabidopsis leaves 60 hpi. The right-side shows close-up images. Black or red  
654 size bars are 1 mm and 50  $\mu$ m, respectively. (C) Quantification of lesion size at 3 dpi. Boxplots represent  
655 median and 1.5 times the interquartile range (n= 80 from three independent experiments). (D)  
656 Quantification of fungal DNA by qPCR at 0, 1, and 2 dpi. The fungal *Cutinase A* gene (Genebank:  
657 Z69264) was quantified relative to *expG* gene (AT4G26410) of Arabidopsis. Bars represent mean values  
658  $\pm$  SE from three independent experiments. (E) Analysis of lesion size of five-week-old WT and transgenic  
659 CCL2 lines droplet-inoculated with *C. higginsianum* (10  $\mu$ L of  $2 \times 10^6$  spores  $\text{mL}^{-1}$  per leaf). Plants were  
660 analyzed 10 dpi. (F) Analysis of lesion size of four-week-old WT and CCL2 lines, droplet-inoculated  
661 with *P. cucumerina* (10  $\mu$ L of  $5 \times 10^6$  spores  $\text{mL}^{-1}$  per leaf). Plants were analyzed 5dpi. Boxplots (E, F)  
662 represent median and 1.5 times the interquartile range (n= 30 from three independent experiments). The



663 data was analyzed by one-way ANOVA and *post-hoc* analysis by Dunnett's multiple-comparison test.  
664 Asterisks show a statistically significant difference between the CCL2 expressing lines and WT plants  
665 (\*\*\*P ≤ 0.001, \*\*P ≤ 0.01; \*P ≤ 0.05, ns, not significant). The letters a and b signify a between-group  
666 difference at the P ≤ 0.05 level.

667

668 **Fig. 4.** CCL2 enhances induction of Arabidopsis defense gene expression in response to *B. cinerea*. Four-  
669 week-old Arabidopsis plants (WT, CCL2 and CCL2-Y92A lines) were spray-inoculated with *B. cinerea*  
670 ( $5 \times 10^5$  spores mL<sup>-1</sup>). Leaves were harvested at 0 and 1dpi for RNA extraction. Transcript levels of *OBP2*  
671 (A), *PDF1.2* (B), and *PR-1* (C) were determined by qPCR. Data were normalized with regard to the  
672 Arabidopsis reference gene *expG*. Data represent mean values ± SE of 3 independent experiments. The  
673 letters a and b signify a between-group difference at the P ≤ 0.05 level. Two-way ANOVA and *post-hoc*  
674 analysis by Tukey's multiple-comparison test were used to calculate significant differences between TG  
675 lines and WT plants.

676

677 **Fig. 5.** Increased resistance of CCL2-lines towards the bacterial pathogen *P. syringae*. Growth of virulent  
678 *Pst* DC3000 in WT plants and CCL2 lines was analyzed at 3 dpi. The bacterial *OprF* gene was quantified  
679 by qPCR using DNA extracted from inoculated leaves. Ten leaf discs from 6 plants were sampled per  
680 replicate. The plant *expG* gene served as reference. Data represent mean values ± SE of 3 independent  
681 experiments (n=18). Asterisks indicate statistically significant differences (\*P ≤ 0.05, \*\*P ≤ 0.01, ns: not  
682 significant; one-way ANOVA and *post-hoc* analysis with Dunnett's multiple-comparison test) between  
683 transgenic lines and wild type.

684

685 **Fig. 6.** Exogenous application of purified CCL2 induces defense gene expression and SAR towards *P.*  
686 *syringae*. Three leaves of four-week-old wild type plants were infiltrated with 10 mM MgCl<sub>2</sub> (negative  
687 mock control), *Pst* DC3000 ( $10^6$  CFU mL<sup>-1</sup>) as positive SAR control, or 500 μg mL<sup>-1</sup> of purified CCL2 or  
688 CCL2-Y92A protein, respectively. (A) Forty-eight hours post treatment, three distal leaves were  
689 challenge-inoculated with *Pst* DC3000 ( $10^5$  CFU mL<sup>-1</sup>). Ten leaf discs per treatment were sampled from  
690 distal leaves of 10 plants at 3 dpi to quantify by qPCR the abundance of the bacterial *OprF* gene as a  
691 proxy for bacterial biomass. (B-F) Transcript levels relative to *expG* gene in local leaves 48 hours after  
692 treatment (B) *GLII* (AT1G80460), (C) *GLYI* (AT2G40690), (D) *PR-1* (AT2G14610), (E) *RBOHD*  
693 (AT5G47910), and (F) *RBOHF* (AT1G64060). Asterisks indicate statistically significant differences (\*P  
694 ≤ 0.05, \*\*P ≤ 0.01, ns: not significant; one-way ANOVA and *post-hoc* analysis with Dunnett's multiple-

695 comparison test) between treatments and mock control. Data represent mean  $\pm$  SD of 3 biological  
696 replicates.

**A**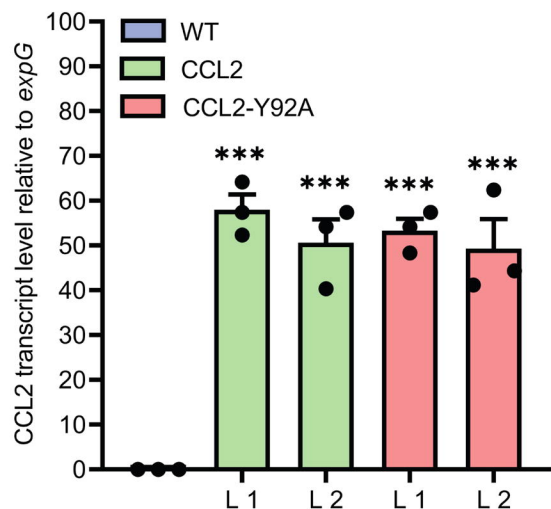**B**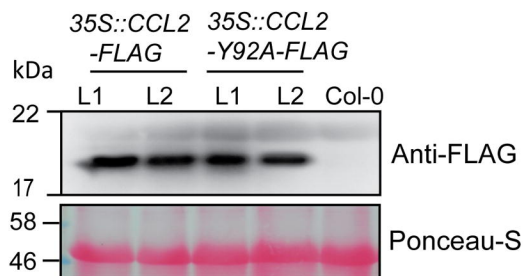**D**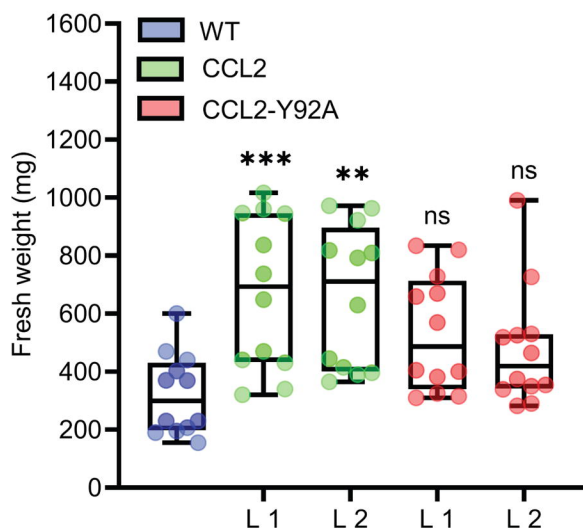**C**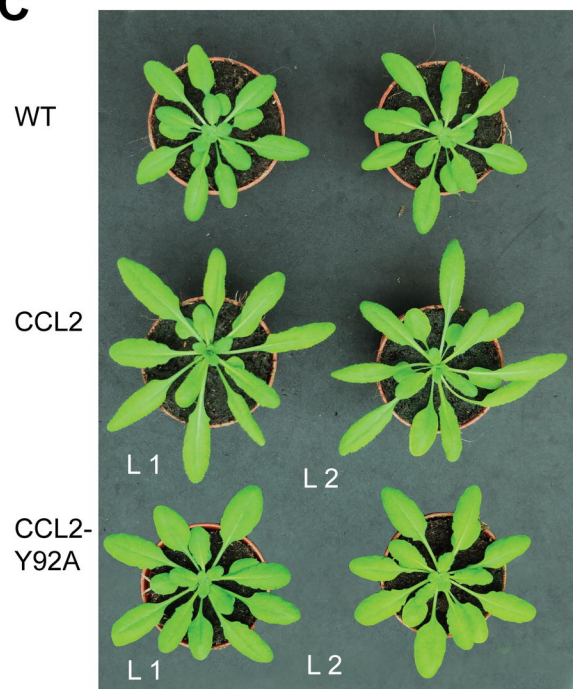**E**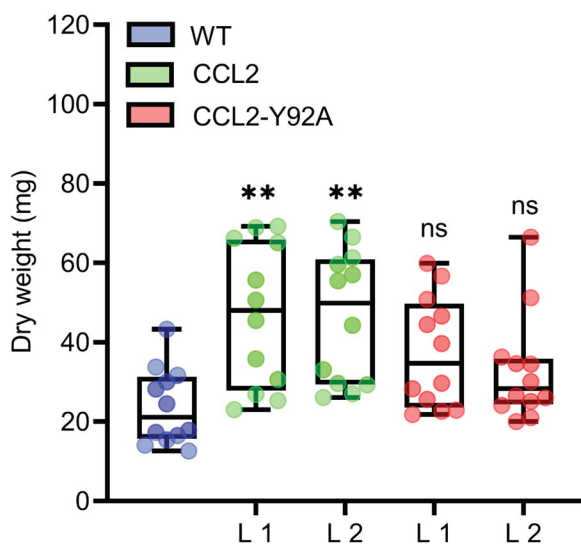

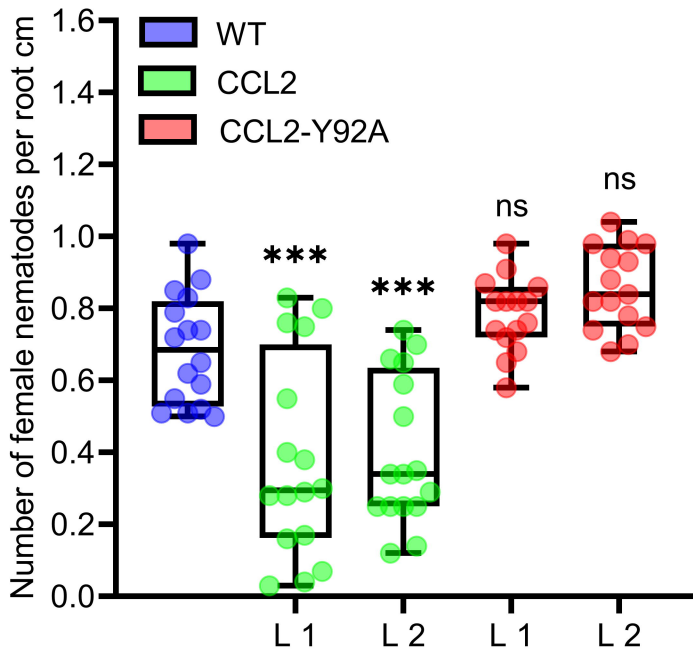

**A**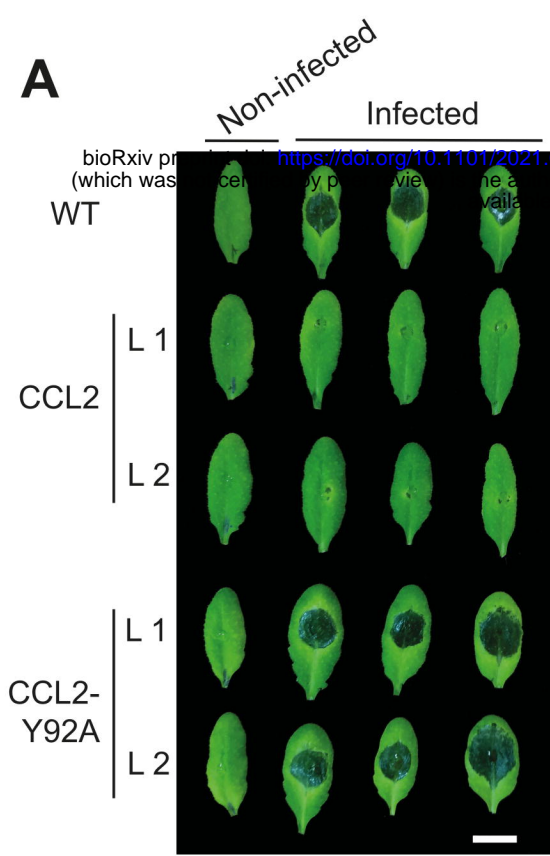**B**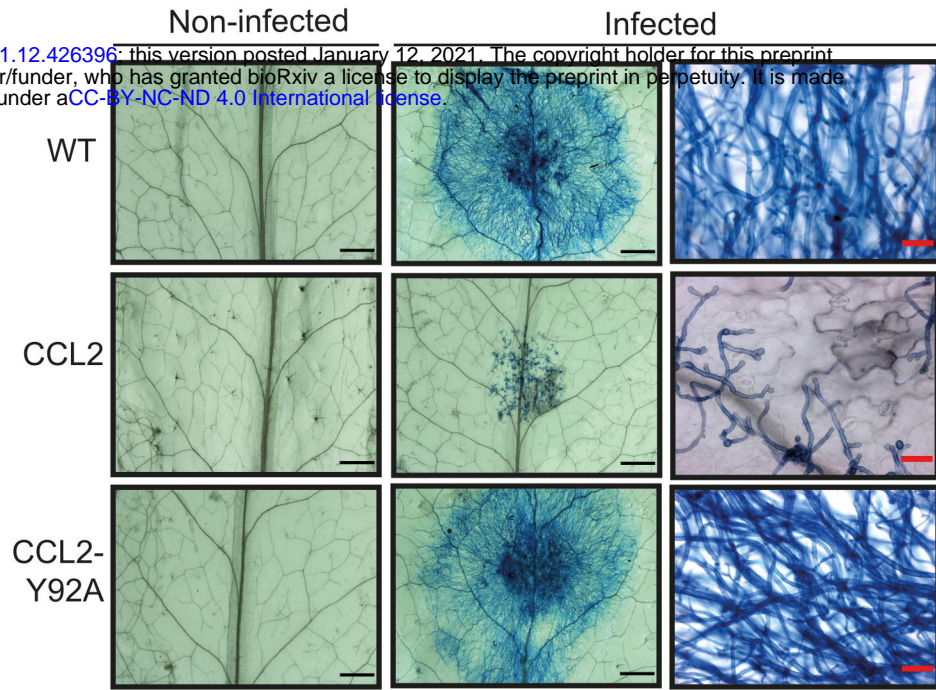**C**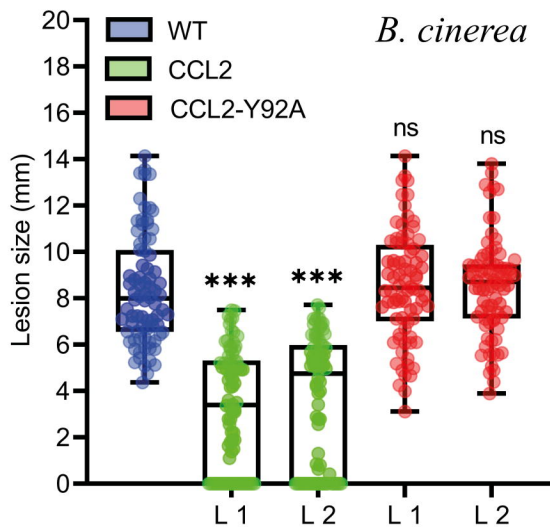**D**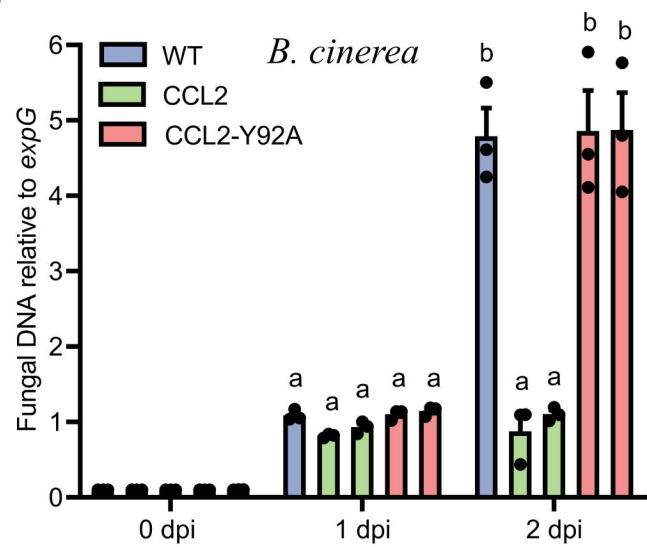**E**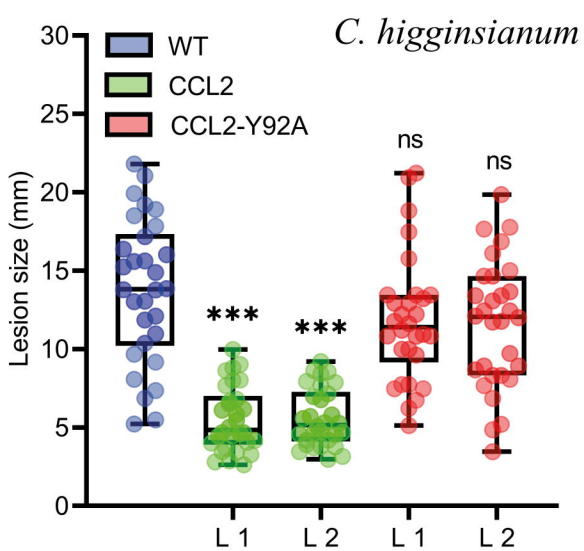**F**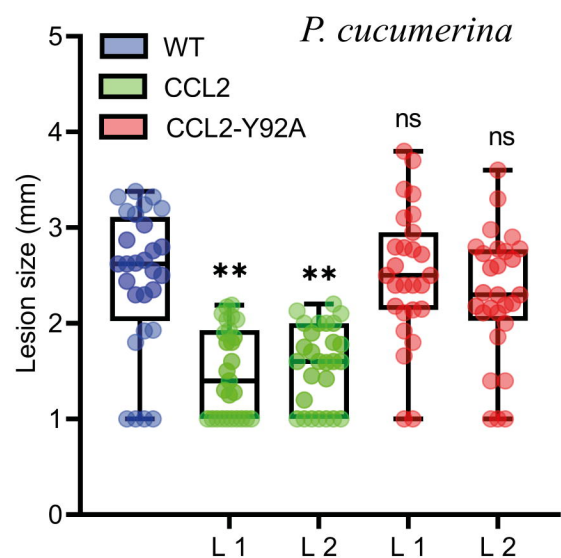

**A***OBP2*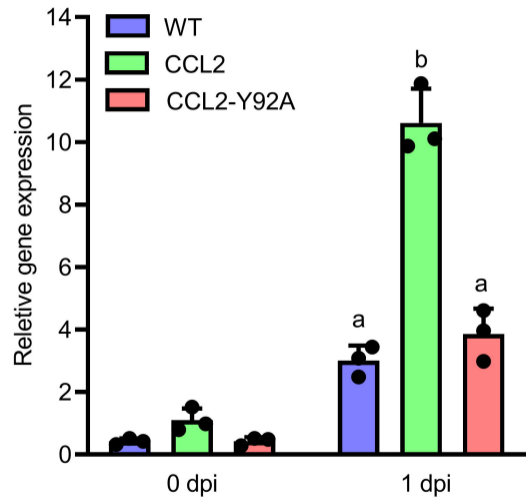**B***PDF 1.2*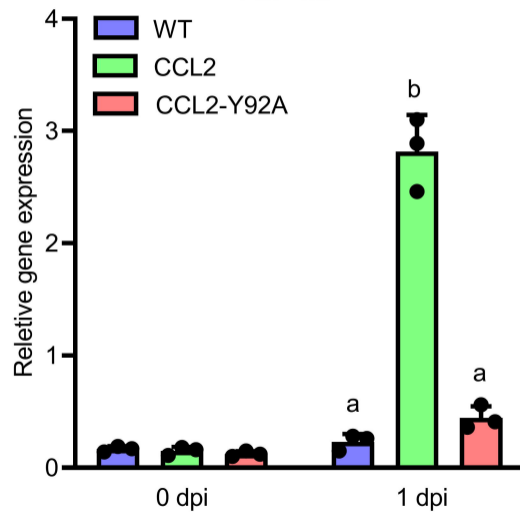**C***PR-1*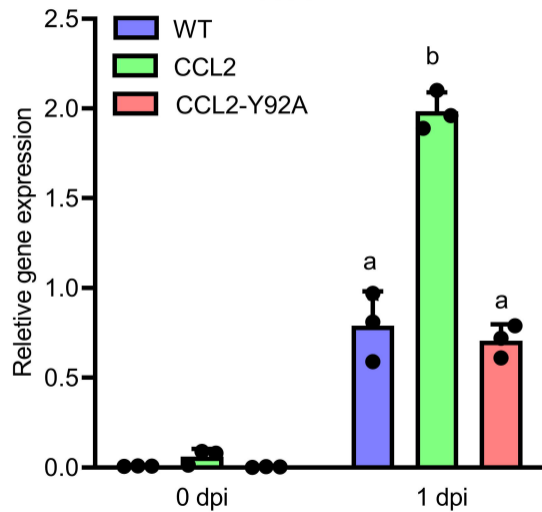

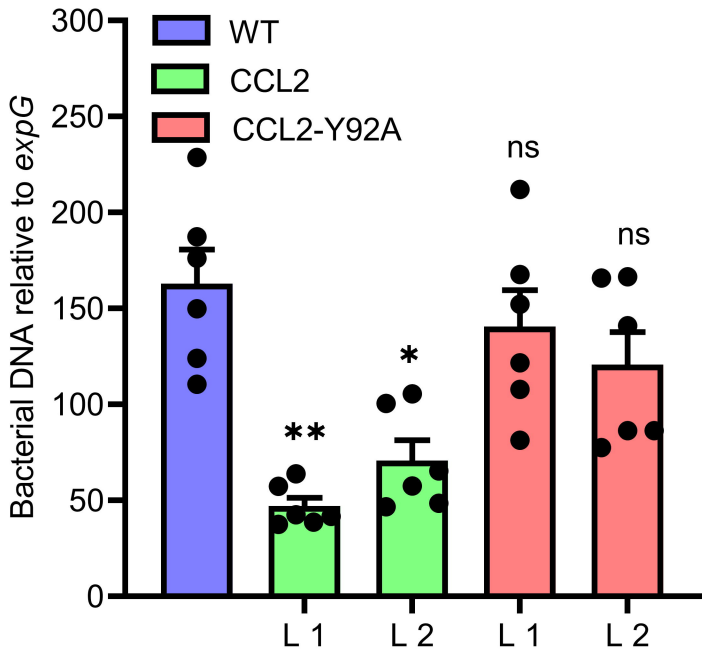

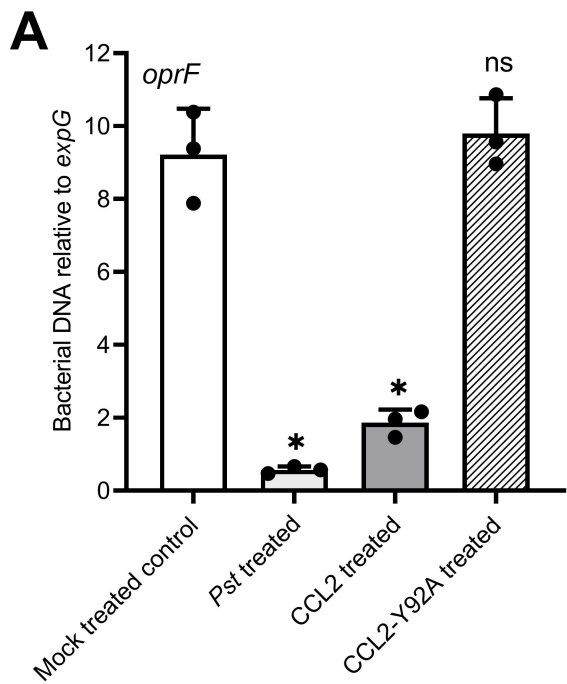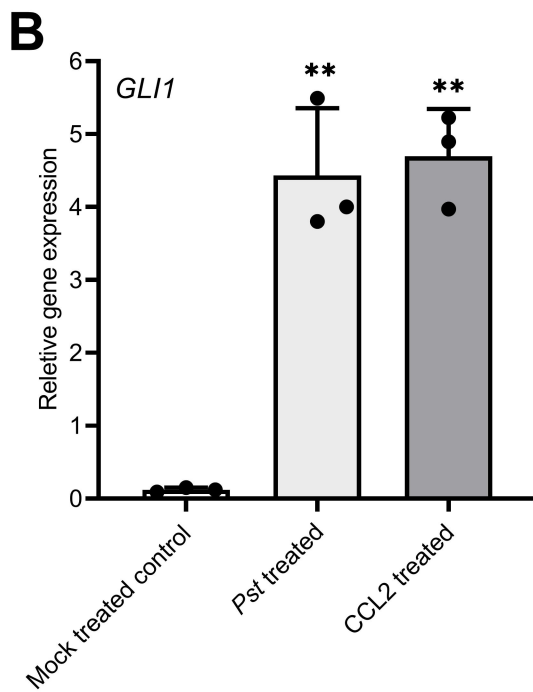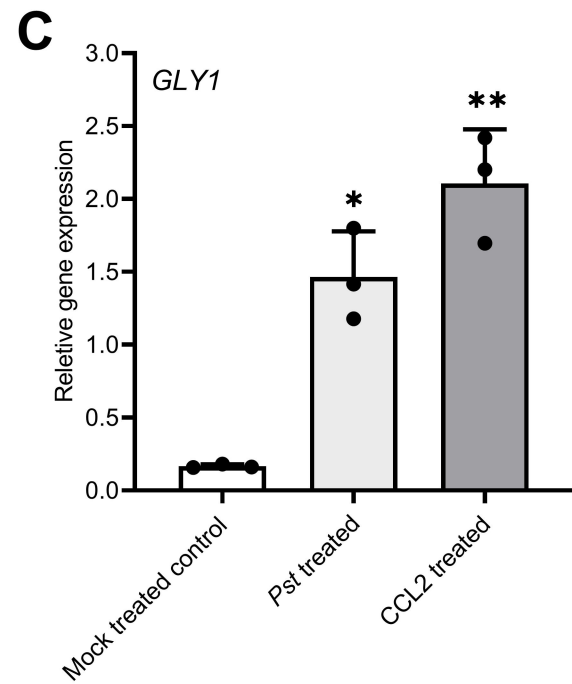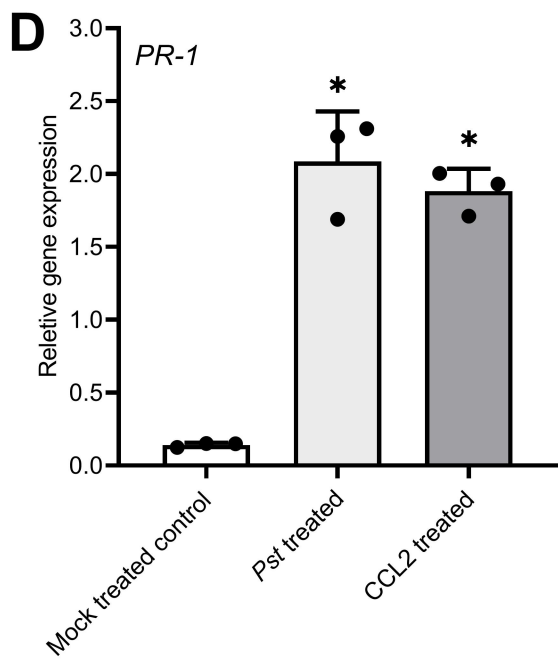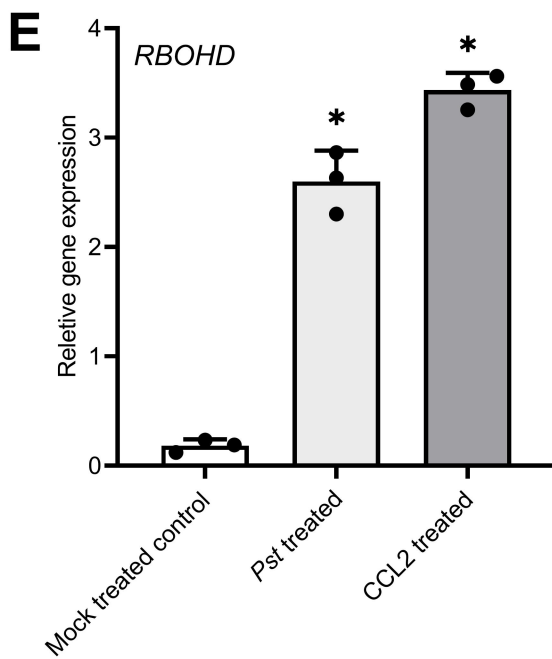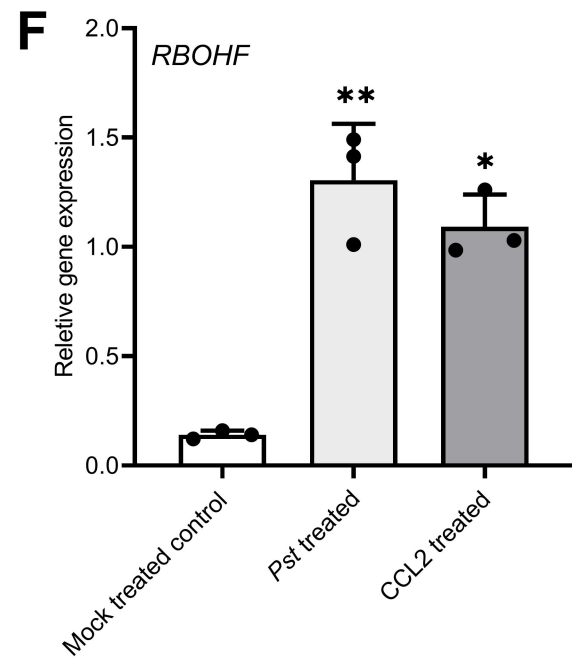

Source: http://biorxiv.org/content/10.1101/2021.01.12.426396v1.full.pdf
